# Supplementary material for: Adenosine triggers early astrocyte reactivity that provokes microglial responses and drives the pathogenesis of sepsis-associated encephalopathy in mice
Source: PubMed Central journal article supplement (PMC11283516; doi:10.1038/s41467-024-50466-y), 2024-07-27
Supplement: 41467_2024_50466_MOESM1_ESM.pdf [file 41467_2024_50466_MOESM1_ESM.pdf]

## **Adenosine triggers early astrocyte reactivity that provokes microglial responses and drives the pathogenesis of sepsis-associated encephalopathy in mice**

Qilin Guo<sup>1,2</sup>, Davide Gobbo<sup>1</sup>, Na Zhao<sup>1,3</sup>, Hong Zhang<sup>4</sup>, Nana-Oye Awuku<sup>5</sup>, Qing Liu<sup>1</sup>, Li-Pao Fang<sup>1,2</sup>, Tanja M. Gampfer<sup>6</sup>, Markus R. Meyer<sup>6</sup>, Renping Zhao<sup>4</sup>, Xianshu Bai<sup>1,2</sup>, Shan Bian<sup>7</sup>, Anja Scheller<sup>1,2</sup>, Frank Kirchhoff<sup>1,2\*</sup>, Wenhui Huang<sup>1,2\*</sup>

1. Molecular Physiology, Center for Integrative Physiology and Molecular Medicine (CIPMM), University of Saarland, 66421, Homburg, Germany
2. Center for Gender-specific Biology and Medicine (CGBM), University of Saarland, 66421 Homburg, Germany
3. Institute of Anatomy and Cell Biology, University of Saarland, 66421, Homburg, Germany
4. Biophysics, CIPMM, University of Saarland, 66421 Homburg, Germany
5. Molecular Neurophysiology, CIPMM, University of Saarland, 66421 Homburg, Germany
6. Department of Experimental and Clinical Toxicology, Institute of Experimental and Clinical Pharmacology and Toxicology, Center for Molecular Signaling (PZMS), University of Saarland, 66421, Homburg, Germany
7. Institute for Regenerative Medicine, Shanghai East Hospital, Frontier Science Center for Stem Cell Research, School of Life Sciences and Technology, Tongji University, 200092, Shanghai, China

(\*) For correspondence:

**Frank Kirchhoff:** Molecular Physiology, Center for Integrative Physiology and Molecular Medicine (CIPMM), University of Saarland, 66421 Homburg, Germany

Email: [frank.kirchhoff@uks.eu](mailto:frank.kirchhoff@uks.eu)

**Wenhui Huang:** Molecular Physiology, Center for Integrative Physiology and Molecular Medicine (CIPMM), University of Saarland, 66421 Homburg, Germany

Email: [wenhui.huang@uks.eu](mailto:wenhui.huang@uks.eu)

**Supplementary information in this PDF file contains Supplementary Figures 1–11 with legends and Supplementary Table 1.**

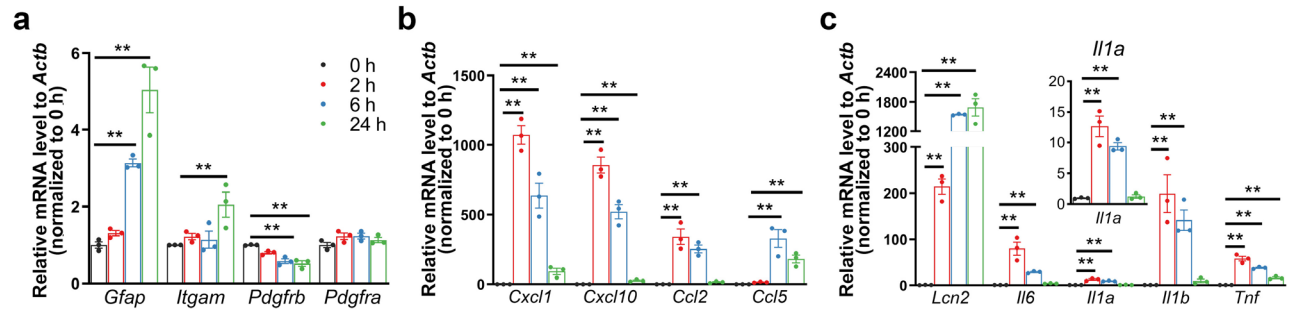

**Supplementary Fig. 1: Peripheral LPS challenge evokes rapid neuroinflammatory responses and glial reaction.**

**a** Changes of marker genes for astrocytes (*Gfap*), microglia (*Itgam*), pericytes (*Pdgrfb*), and OPCs (*Pdgfra*) in the cortex after PBS/LPS injection (n = 3 mice per group).

**b, c** Expression levels of several chemokines and proinflammatory cytokines in the cortex after PBS/LPS injection (n = 3 mice per group).

Summary data are presented as the mean  $\pm$  SEM. Statistical significance in a-c were assessed by two-way ANOVA, Fisher's LSD test; \*P < 0.05, \*\*P < 0.01, \*\*\*P < 0.001. Source data are provided as a Source Data file.

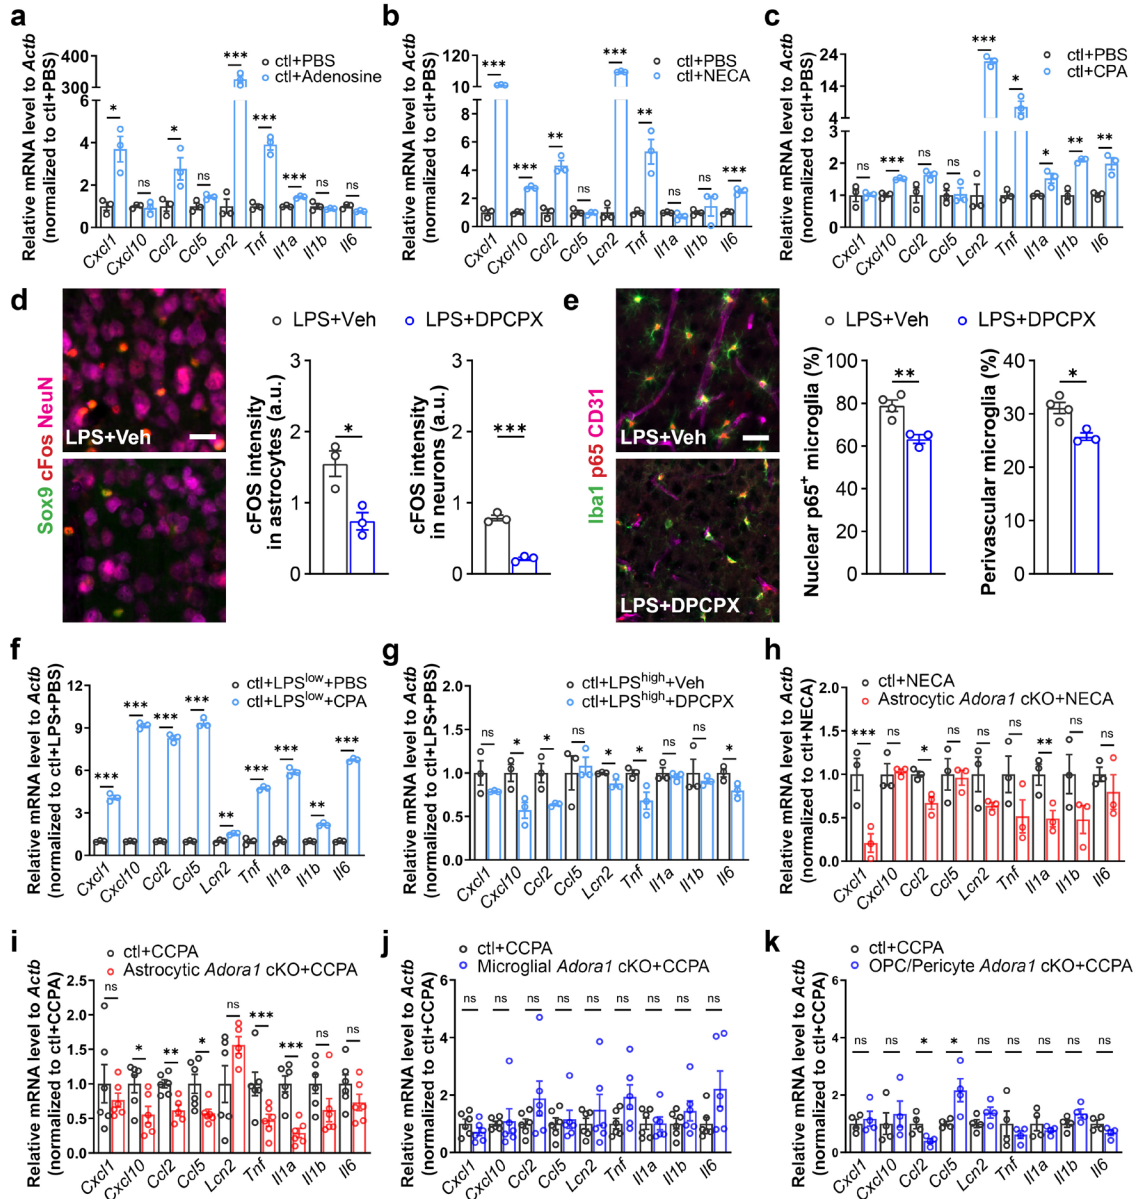

## Supplementary Fig. 2: Adenosine evokes upregulation of inflammation-related genes in the brain via A1AR signaling.

**a-c** Expression of inflammation-related genes were enhanced in the mouse cortex six hours post adenosine, NECA, and CPA injections (n = 3 mice per group).

**d** Representative images of immunoreactivity of c-Fos in Sox9<sup>+</sup> astrocytes and NeuN<sup>+</sup> neurons in the mouse cortex upon LPS and A1AR antagonist (DPCPX) injection (left). c-Fos expression in astrocytes and neurons was reduced by DPCPX (right) (n = 3 mice per group).

**e** Representative images of immunolabeled nuclear p65<sup>+</sup> microglia and CD31<sup>+</sup> blood vessels upon LPS and A1AR antagonist (DPCPX) injection (left). Nuclear p65<sup>+</sup> microglia and perivascular microglia were reduced by DPCPX (right) (n = 4 mice in LPS+Veh group, n = 3 mice in LPS+DPCPX group).

**f** CPA further upregulated the inflammation-related genes in the cortex induced by a peripheral LPS<sub>low</sub> (1 mg/kg, i.p.) injection. (n = 3 mice per group).

**g** DPCPX administration reduced the inflammation-related genes in the cortex induced by a peripheral LPS<sub>high</sub> (5mg/kg, i.p.) injection. (n = 3 mice per group).

**h, i** Inflammation-related gene expressions were reduced in the cortex of *Adora1* cKO mice at 6 hours post NECA and CCPA injection compared to ctrl mice (n = 3 mice per group in (G), n = 6 mice per group in (H)).

**j, k** Inflammation-related gene expressions were not altered in the cortex of mice with specific ablation of *Adora1* in microglia (using Cx3CR1-CreERT2 mice) and oligodendrocyte precursor cells/pericytes (using NG2-CreERT2 mice, only *Ccl2* was reduced).

Summary data are presented as the mean  $\pm$  SEM. Statistical significance in **a-k** was assessed by two-tailed unpaired Student's t test; \*P < 0.05, \*\*P < 0.01, \*\*\*P < 0.001. Source data are provided as a Source Data file.

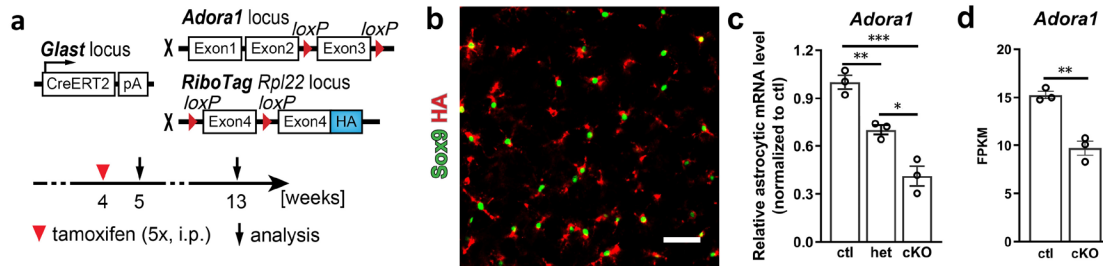

**Supplementary Fig. 3: Generation and validation of astrocyte-specific A1AR deficient mice.**

**a** Schematic illustration of mouse breeding for astrocyte-specific A1AR deficient mice (*Adora1* cKO) and experiment plan. GLAST-CreERT2 (GLAC) mice were crossed to floxed *Adora1* mice. RiboTag mice were also introduced to the breeding for specifically and directly purify translated mRNA from astrocytes without sorting cells.

**b** Representative image of RiboTag expression (indicated by HA-tag) in Sox9<sup>+</sup> astrocytes. Scale bar = 50 μm.

**c** *Adora1* expression in astrocytes was reduced in *Adora1*<sup>fl/wt</sup> (het) and *Adora1* cKO mice one week after tamoxifen injection by using qPCR (n = 3 mice per group).

**d** *Adora1* expression in astrocytes was reduced in *Adora1* cKO mice 9 weeks after tamoxifen injection by using RNA-Seq (n = 3 mice per group).

Summary data are presented as the mean ± SEM. Statistical significance in **c** was assessed using a one-way ANOVA, Fisher's LSD test; statistical significance in **d** was assessed using two tailed unpaired Student's t test, \*P < 0.05, \*\*P < 0.01, \*\*\*P < 0.001. Source data are provided as a Source Data file.

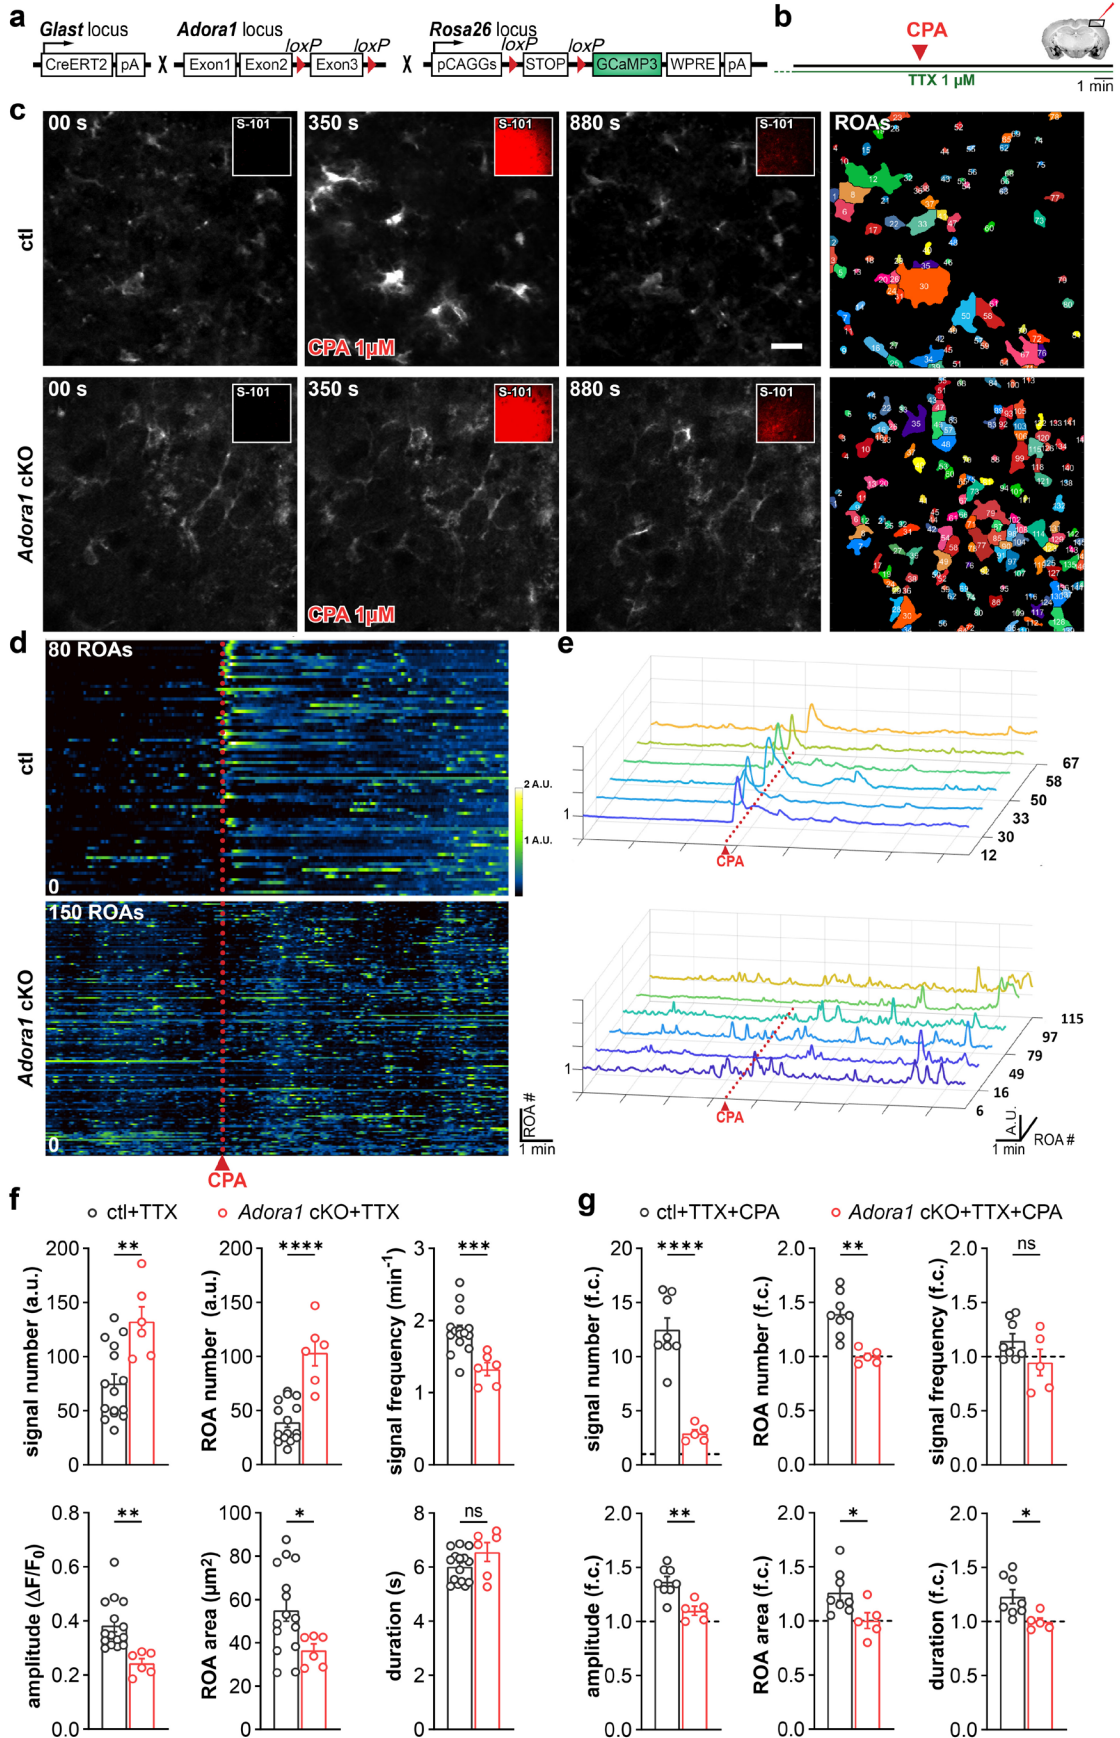

**Supplementary Fig. 4: Functional validation of astrocyte-specific A1AR deficient mice by Ca<sup>2+</sup> imaging.**

**a, b** Schematic illustration of mouse breeding for Ca<sup>2+</sup> imaging and experiment plan. GLACx<sup>fl/fl</sup>A1AR<sup>fl/fl</sup> mice were crossed to Rosa26-GCaMP3 mice. GLACx<sup>fl/fl</sup>A1AR<sup>fl/fl</sup>xRosa26-GCaMP3 mice were treated with tamoxifen at 4 weeks and used for *ex vivo* Ca<sup>2+</sup> imaging at 13 weeks of age. Coronal brain slices were incubated in TTX (tetrodotoxin). During recording the A1AR agonist CPA (1 μM) was applied focally. Sulforhodamine 101 (SR101, 4 μg/ml) was mixed with CPA to indicate the drug application.

**c** Images showing the change of Ca<sup>2+</sup> activity during the recording in ctl and *Adora1* cKO mice. Notably, CPA application evoked high Ca<sup>2+</sup> increase in ctl mice which was not observed in *Adora1* cKO mice, functionally confirming the deletion of A1ARs in astrocytes. The rightmost images show automatically detected regions of interests (ROIs) with dynamic Ca<sup>2+</sup> activities by a custom-made tool MSparkles.

**d** Heatmap plot showing amplitude and duration of spontaneous Ca<sup>2+</sup> events detected from all ROIs.

**e** Six ROIs were selected to show the characteristics of Ca<sup>2+</sup> events.

**f, g** Analyses of Ca<sup>2+</sup> events in ctl (n = 15 slices from 3 mice) and *Adora1* cKO (n = 6 slices from 3 mice) slices mice before (as baseline) and after CPA application using MSparkles.

Summary data are presented as the mean ± SEM. Statistical significance in **f, g** was assessed using two tailed unpaired Student's t test, \*P < 0.05, \*\*P < 0.01, \*\*\*P < 0.001, \*\*\*\*P < 0.0001. Source data are provided as a Source Data file.

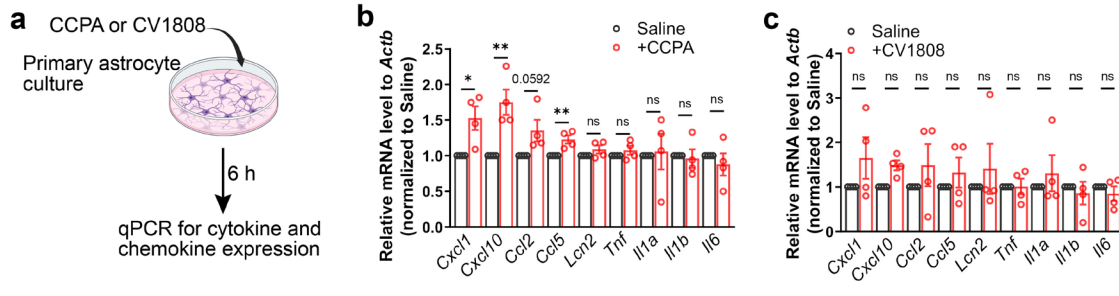

**Supplementary Fig. 5: Activation of A1AR evokes upregulation of inflammation-related genes in primary astrocytes.**

**a** Schematic illustration of drug application to primary astrocytes. Created with BioRender.com released under a Creative Commons Attribution-NonCommercial-NoDerivs 4.0 International license.

**b, c** CCPA application significantly increased expression levels of several chemokines (e.g., *Cxcl1*, *Cxcl10*, *Ccl5*), whereas CV1808 (non-selective antagonist of A2ARs) did not cause significant expression alterations of all the tested inflammation-related genes.

Summary data are presented as the mean  $\pm$  SEM, n = 4 individual primary cultures. Statistical significance of each gene expression in **b, c** was assessed using two tailed unpaired Student's t test, ns: not significant, \*P < 0.05, \*\*P < 0.01. Source data are provided as a Source Data file.



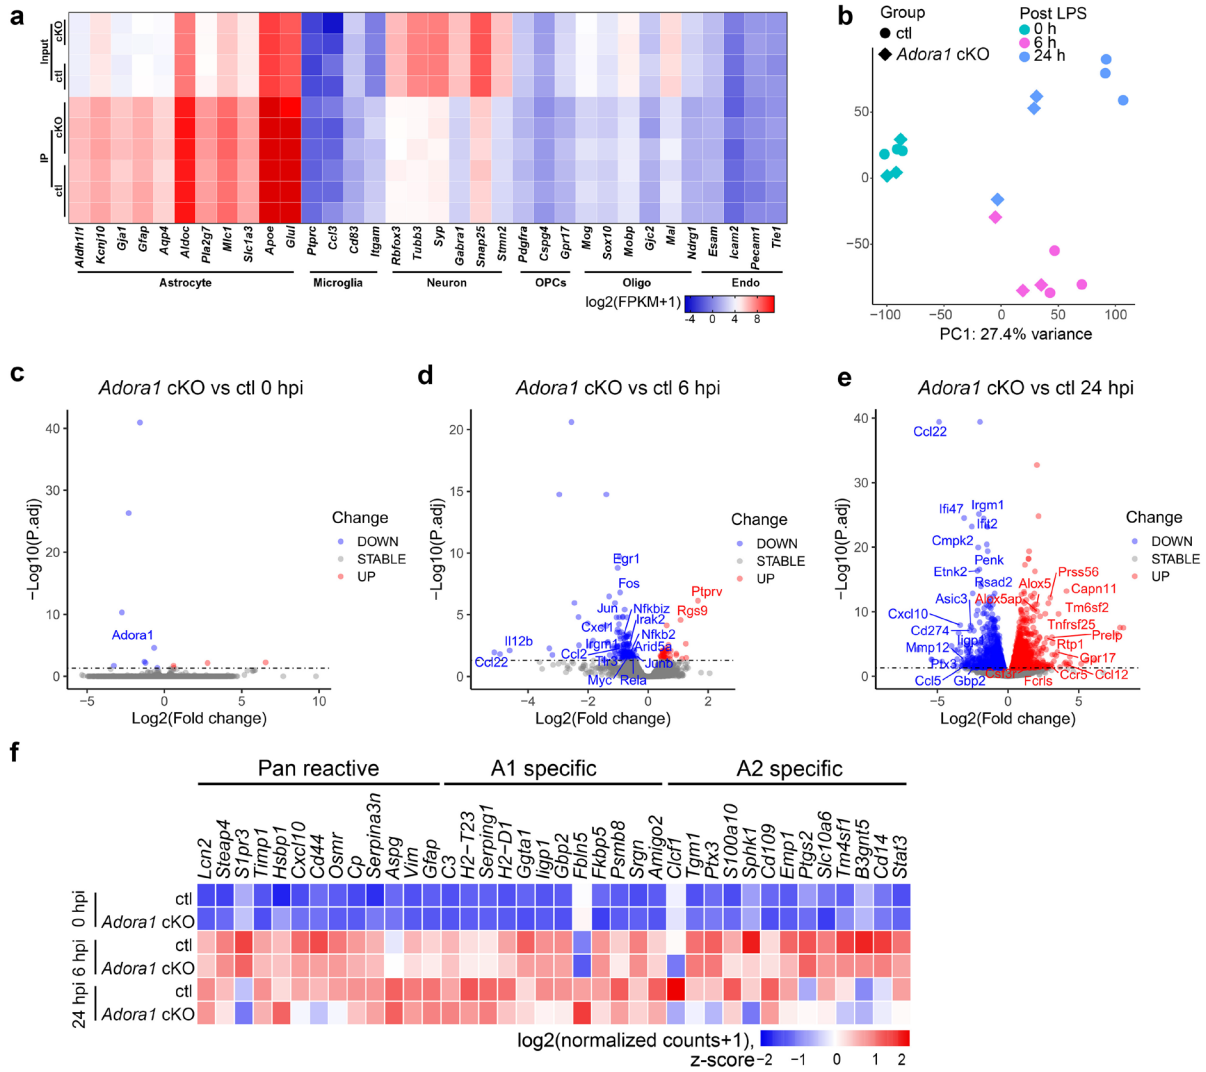

**Supplementary Fig. 6: A1AR-deficient astrocytes are less reactive to the peripheral LPS challenge.**

**a** Heatmap of cell type-specific marker gene expression showed immunoprecipitation (IP) of RiboTag enriched astrocyte-specific genes.

**b** PCA (principal component analysis) of the RNA-seq dataset (n = 3 mice per group).

**c-e** Volcano plots showing gene expression changes in *Adora1* cKO group compared to ctl group at 0 hpi, 6 hpi, 24 hpi.

**f** Heatmap of marker genes for A1/A2 astrocytes.

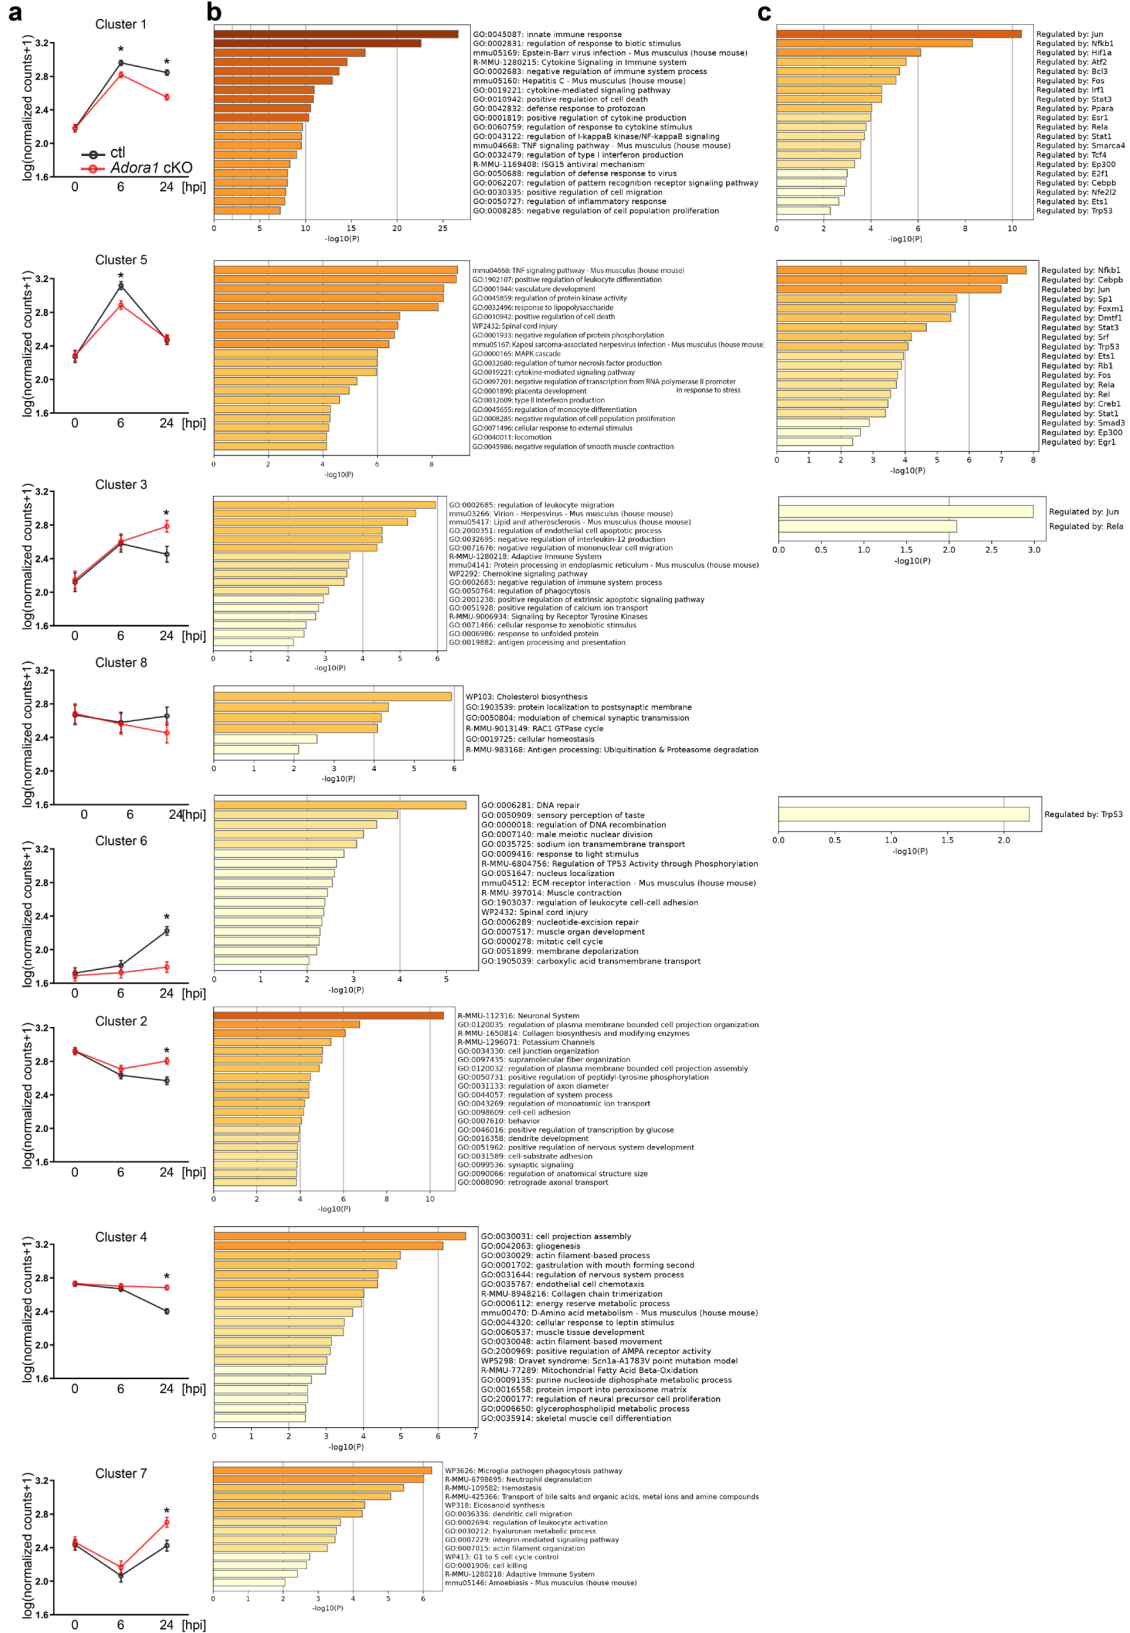

**Supplementary Fig. 7: Transcriptomic data analysis reveals A1AR-deficient astrocytes are less reactive to the peripheral LPS challenge.**

**a** Mean profile representation of the temporal gene expression pattern for each cluster in **Fig. 4a**. Data points correspond to 0 hpi, 6 hpi, 24 hpi.

**b** Metascape pathways for each cluster in **Fig. 4a** generated by Metascape analysis.

**c** List of prediction of transcription regulators following expression pattern of sub-clusters in **Fig. 4a**.

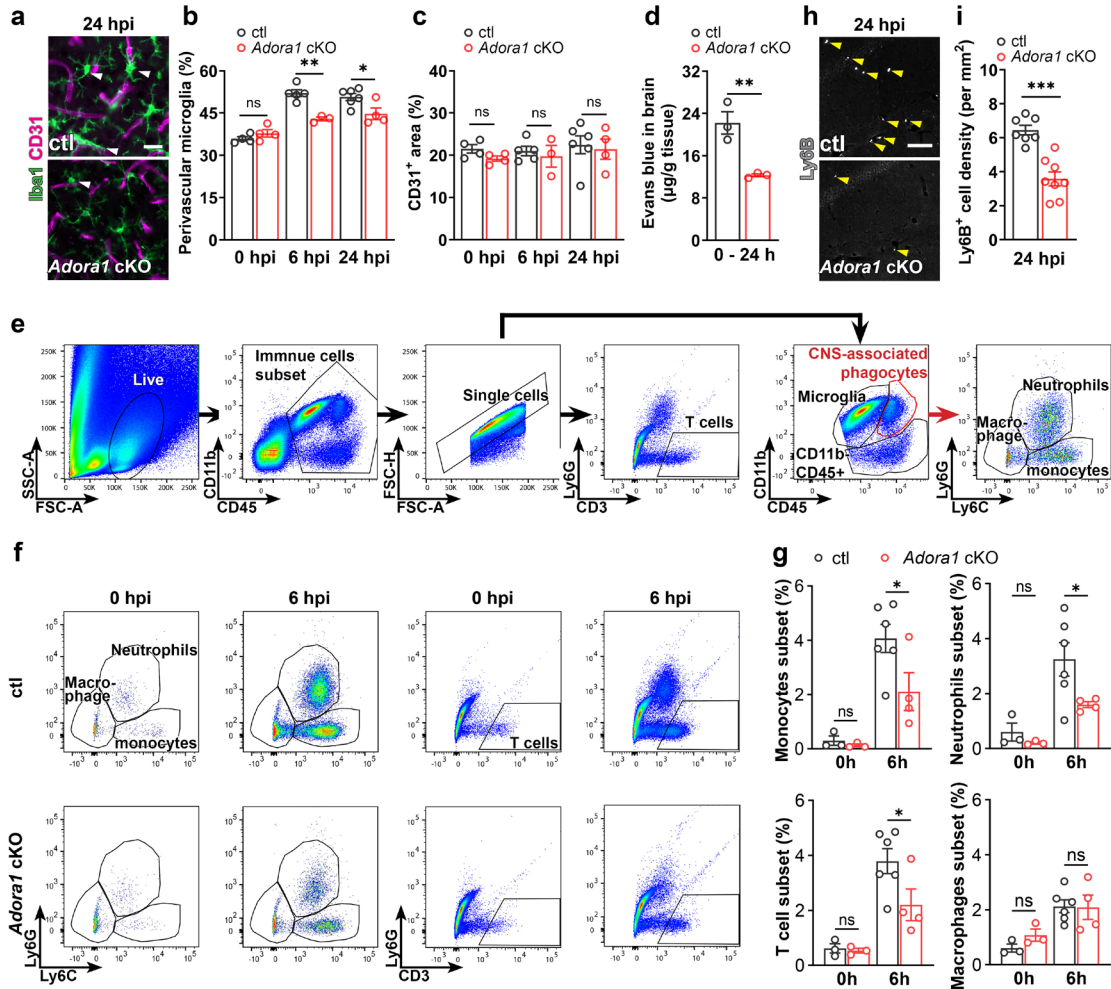

**Supplementary Fig. 8: Astrocytic A1AR deficiency reduces BBB disruption and neutrophil infiltration post peripheral LPS injection.**

**a** Representative images of immunolabeled Iba1<sup>+</sup> microglia and CD31<sup>+</sup> blood vessels at 24 hpi. Arrowheads indicate perivascular microglia. Scale bar = 20  $\mu$ m.

**b** Proportion of perivascular microglia was increased in *Adora1* cKO mice compared to ctl mice (n = 4 mice in ctl and *Adora1* cKO at 0 hpi, n = 5 mice in ctl at 6 hpi, n = 3 mice in *Adora1* cKO at 6 hpi, n = 6 mice in ctl at 24 hpi, n = 4 mice in *Adora1* cKO at 24 hpi).

**c** CD31<sup>+</sup> area was not altered in *Adora1* cKO and ctl mice at 0 hpi, 6 hpi, 24 hpi.

**d** EB extravasation was reduced in the brains of *Adora1* cKO mice compared to ctl mice which were injected with EB at 0 hpi and analyzed at 24 hpi (n = 3 mice per group).

**e** Gating strategy for different cell types from brain cell suspension.

**f** Proportion of infiltrated immune cell (monocytes, neutrophils, and T cells) was reduced in the brain of cKO mice at 6 hpi, except macrophages.

**g** Statistical analysis of the ratio of specific immune cell subtypes in the immune cell subset (single cells). One dot stands for one mouse. (n = 3 ctl and *Adora1* cKO mice at 0 hpi; n = 6 ctl mice and 4 *Adora1* cKO mice at 6 hpi).

**h** Representative images of immunolabeled of Ly6B<sup>+</sup> neutrophils in the brain parenchyma at 24 hpi. Scale bars = 20  $\mu$ m.

**i** The density of Ly6B<sup>+</sup> cells was reduced in the brain of *Adora1* cKO mice compared to ctl mice at 24 hpi (n = 7 ctl mice and 8 *Adora1* cKO mice).

Summary data are presented as the mean  $\pm$  SEM. Statistical significance in **b**, **c**, **g** were assessed using a two-way ANOVA, Fisher's LSD test. Statistical significance in **d**, **i** was assessed using

two-tailed unpaired Student's t test, ns: not significant, \*P < 0.05, \*\*P < 0.01, \*\*\*P < 0.001. Source data are provided as a Source Data file.

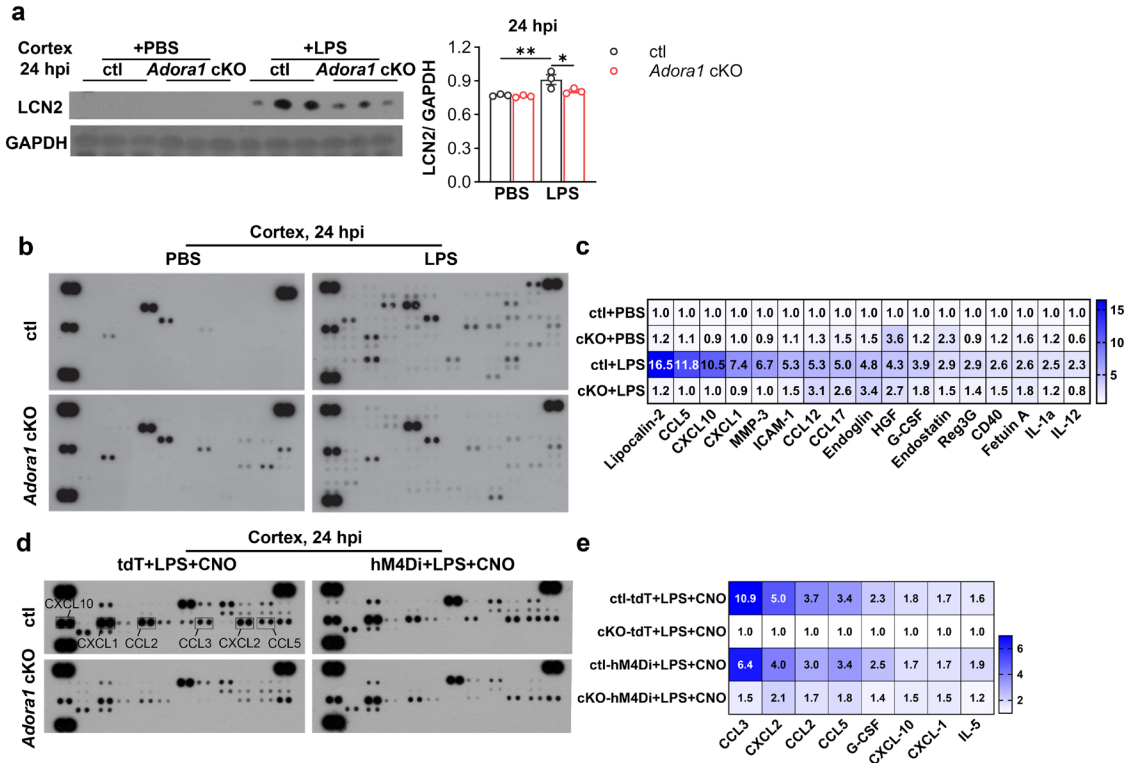

**Supplementary Fig. 9: Astrocytic A1AR deficiency reduces overall neuroinflammation upon LPS challenge which is attenuated by enhancing Gi signaling.**

**a** LCN2 expression was reduced in *Adora1* cKO compared to ctl 24 hpi by Western blot.

**b, c** The expression of 111 cytokines in the cortex of ctl and *Adora1* cKO mice was measured by a proteomic profiling assay at 24 h after PBS or LPS injection. Cytokine expression was reduced in the cortex of *Adora1* cKO group compared to ctl (PBS) group (samples from 3 mice were mixed for each group).

**d, e** The expression of 40 cytokines in the cortex of AAV-infected ctl and *Adora1* cKO mice was measured by a proteomic profiling assay 24 hours after LPS and CNO injection. Enhancing Gi signaling in *Adora1* cKO mice increased cytokine expression after LPS and CNO injection (samples from 3 mice were pooled for each group).

Summary data are presented as the mean ± SEM. Statistical significance in **a** were assessed by two-way ANOVA, Fisher's LSD test, ns: not significant, \**P* < 0.05, \*\**P* < 0.01. Source data are provided as a Source Data file.

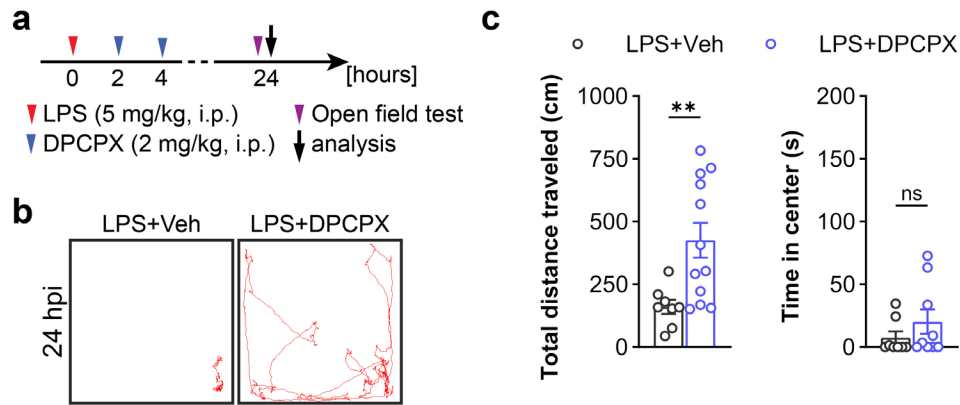

**Supplementary Fig. 10: A1AR antagonist treatment ameliorated depression-like behavior of mice post LPS injection.**

**a** Schematic illustration. Ctl mice were injected with DPCPX at the early phase of systemic inflammation and were used in open-field test at 24 h post LPS injection.

**b** Representative trajectory analysis of Vehicle (Veh) and DPCPX-treated mice in 10 min in the open-field test at 24 hpi.

**c** DPCPX treated mice displayed increased locomotion compared to vehicle ctrl mice at 24 hpi (n = 8 mice in LPS+Veh group, n = 12 mice in LPS+DPCPX group).

Summary data are presented as the mean  $\pm$  SEM in **c**. Statistical significance in **c** was assessed using two-tailed unpaired Student's t test. ns: not significant, \*\*P < 0.01. Source data are provided as a Source Data file.

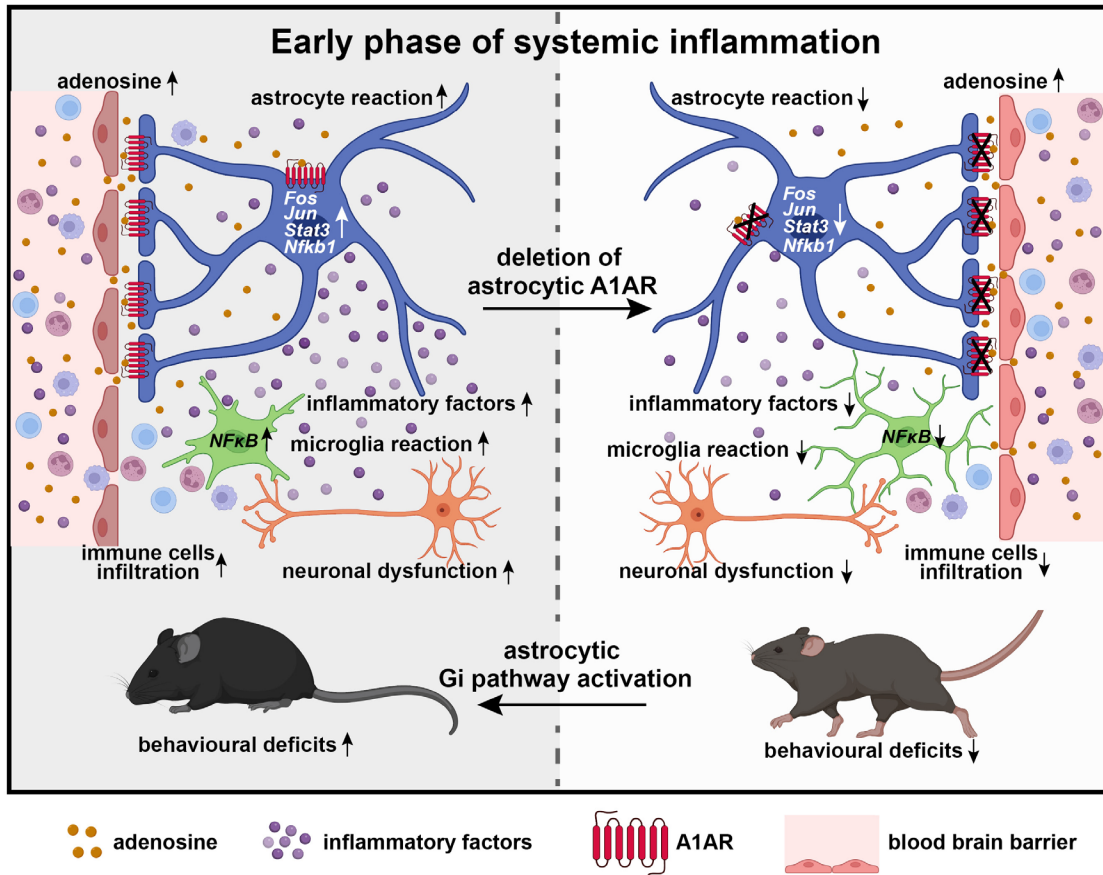

**Supplementary Fig. 11: Graphical abstract.**

Graphical abstract was created with BioRender.com released under a Creative Commons Attribution-NonCommercial-NoDerivs 4.0 International license.



## Supplementary Table 1: key resources

| REAGENT or RESOURCE                                                                      | SOURCE                      | IDENTIFIER        |
|------------------------------------------------------------------------------------------|-----------------------------|-------------------|
| <b>Antibodies</b>                                                                        |                             |                   |
| Goat anti-Sox9 (1:500)                                                                   | R&D Systems                 | Cat# AF3075       |
| Rabbit anti-Iba1 (1:1000)                                                                | Wako                        | Cat# 019-19741    |
| Goat anti-Iba1 (1:500)                                                                   | abcam                       | Cat# ab5076       |
| Mouse anti-NeuN (1:500)                                                                  | Millipore                   | Cat# MAB377       |
| Rat anti-CD31 (1:100)                                                                    | BD Pharmingen               | Cat# 550274       |
| Rat anti-Ly6B (1:500)                                                                    | Bio Rad                     | Cat# MCA771GT     |
| Mouse anti-HA (1:500)                                                                    | Biologend                   | Cat# 901513       |
| Goat anti-LCN2 (1:1000)                                                                  | R&D Systems                 | Cat# AF1857       |
| Chicken anti-GFP (1:1000)                                                                | Thermo Fisher Scientific    | Cat# 10524234     |
| Rabbit anti-p-STAT3 (1:1000)                                                             | Cell Signaling Technology   | Cat# 9145         |
| Rabbit anti-NF-kappaB p65 (1:500)                                                        | Cell Signaling Technology   | Cat# 8242         |
| Guinea pig anti-cFos (1:4000)                                                            | Synaptic Systems            | Cat# 226004       |
| Brilliant Violet 421™ anti-mouse CD45 Antibody                                           | Biologend                   | Cat# 103133       |
| APC anti-mouse Ly-6G Antibody                                                            | Biologend                   | Cat# 127613       |
| PerCP anti-mouse/human CD11b Antibody                                                    | Biologend                   | Cat# 101229       |
| PE/Cyanine7 anti-mouse Ly-6C Antibody                                                    | Biologend                   | Cat# 128017       |
| APC/Cyanine7 anti-mouse CD3 Antibody                                                     | Biologend                   | Cat# 100221       |
| Brilliant Violet 421™ Rat IgG2b, κ Isotype Ctrl Antibody                                 | Biologend                   | Cat# 400639       |
| APC Rat IgG2a, κ Isotype Ctrl Antibody                                                   | Biologend                   | Cat# 400511       |
| PerCP Rat IgG2b, κ Isotype Ctrl Antibody                                                 | Biologend                   | Cat# 400629       |
| PE/Cyanine7 Rat IgG2c, κ Isotype Ctrl Antibody                                           | Biologend                   | Cat# 400721       |
| APC/Cyanine7 Rat IgG2b, κ Isotype Ctrl Antibody                                          | Biologend                   | Cat# 400623       |
| Donkey anti-rabbit IgG (H+L) cross-adsorbed secondary antibody, Alexa Fluor 488 (1:1000) | Thermo Fisher Scientific    | Cat# A-21206;     |
| Donkey anti-rabbit IgG (H+L) cross-adsorbed secondary antibody, Alexa Fluor 546 (1:1000) | Thermo Fisher Scientific    | Cat# A10040;      |
| Donkey anti-rabbit IgG (H+L) cross-adsorbed secondary antibody, Alexa Fluor 647 (1:1000) | Thermo Fisher Scientific    | Cat# A-31573;     |
| Donkey anti-goat IgG (H+L) cross-adsorbed secondary antibody, Alexa Fluor 488 (1:1000)   | Thermo Fisher Scientific    | Cat# A-11055;     |
| Donkey anti-goat IgG (H+L) cross-adsorbed secondary antibody, Alexa Fluor 546 (1:1000)   | Thermo Fisher Scientific    | Cat# A-11056;     |
| Donkey anti-goat IgG (H+L) cross-adsorbed secondary antibody, Alexa Fluor 647 (1:1000)   | Thermo Fisher Scientific    | Cat# A-21447;     |
| Donkey anti-mouse IgG (H+L) cross-adsorbed secondary antibody, Alexa Fluor 488 (1:1000)  | Thermo Fisher Scientific    | Cat# A-21202;     |
| Donkey anti-mouse IgG (H+L) cross-adsorbed secondary antibody, Alexa Fluor 546 (1:1000)  | Thermo Fisher Scientific    | Cat# A10036;      |
| Donkey anti-mouse IgG (H+L) cross-adsorbed secondary antibody, Alexa Fluor 647 (1:1000)  | Thermo Fisher Scientific    | Cat# A-31571;     |
| Donkey anti-Guinea Pig IgG (H+L) secondary antibody, Alexa Fluor 647-AffiniPure (1:1000) | Jackson ImmunoResearch Labs | Cat# 706-605-148; |
| Donkey anti-chicken IgY (IgG) (H+L) secondary antibody, Alexa Fluor 488 (1:1000)         | Thermo Fisher Scientific    | Cat# A78948;      |
| Cy5-AffiniPure Donkey Anti-Rat IgG (H+L) (1:1000)                                        | Jackson ImmunoResearch Labs | Cat# 712-175-150; |
| <b>Drugs, Chemicals, and Kits</b>                                                        |                             |                   |
| APCP                                                                                     | Tocris Bioscience           | Cat# 3633         |
| NBMPR                                                                                    | Sigma-Aldrich               | Cat# N2255        |
| Dipyridamole                                                                             | Sigma-Aldrich               | Cat# D9766        |
| EHNA                                                                                     | Sigma-Aldrich               | Cat# E114         |
| Iodotubercidine                                                                          | Sigma-Aldrich               | Cat# I100         |

|                                                         |                          |                  |
|---------------------------------------------------------|--------------------------|------------------|
| Adenosine                                               | Sigma-Aldrich            | Cat# A9251       |
| DPCPX                                                   | abcam                    | Cat# ab120396    |
| CPA                                                     | abcam                    | Cat# ab120398    |
| CCPA                                                    | Tocris Bioscience        | Cat# 1705        |
| NECA                                                    | Tocris Bioscience        | Cat# 1691        |
| Evans blue                                              | Sigma-Aldrich            | Cat# E2129       |
| Lipopolysaccharides from <i>Escherichia coli</i> O55:B5 | Sigma-Aldrich            | Cat# L2880       |
| Sulforhodamine 101                                      | Thermo Fisher Scientific | Cat# S359        |
| Proteome Profiler Mouse Cytokine Array Kit, Panel A     | R&D Systems              | Cat# ARY006      |
| Proteome Profiler Mouse XL Cytokine Array               | R&D Systems              | Cat# ARY028      |
| Adenosine Assay Kit (Fluorometric)                      | abcam                    | Cat# ab211094    |
| RNeasy Micro Kit                                        | QIAGEN                   | Cat# 74004       |
| Omniscript RT Kit                                       | QIAGEN                   | Cat# 205113      |
| Cycloheximide                                           | Sigma-Aldrich            | Cat# C7698       |
| DL-Dithiothreitol                                       | Sigma-Aldrich            | Cat# D0632       |
| Heparin sodium salt from porcine intestinal mucosa      | Sigma-Aldrich            | Cat# H5515       |
| Clozapine N-oxide dihydrochloride (CNO)                 | Tocris Bioscience        | Cat# 6329        |
| Tamoxifen                                               | Carbobution              | Cat# CC99648     |
| Sucrose                                                 | Sigma-Aldrich            | Cat# S0389       |
| TRIZMA® base                                            | Sigma-Aldrich            | Cat# T1503       |
| Hot Start Taq EvaGreen® qPCR Mix (No ROX)               | Axon                     | Cat# 27490       |
| 2-Mercaptoethanol                                       | Sigma-Aldrich            | Cat# M3148       |
| Hanks' Balanced Salt solution                           | Sigma-Aldrich            | Cat# H6648       |
| NP40                                                    | Sigma-Aldrich            | Cat# 74385       |
| Recombinant RNasin™ Ribonuclease Inhibitor              | Promega                  | Cat# N2515       |
| cOmplete™ Protease Inhibitor Cocktail                   | Roche                    | Cat# 11836145001 |
| Dynabeads™ Protein G for Immunoprecipitation            | Thermo Fisher Scientific | Cat# 10004D      |
| UltraPure™ 1M Tris-HCl buffer, pH 7.5                   | Thermo Fisher Scientific | Cat# 15567027    |
| KCl (2 M), RNase free                                   | Thermo Fisher Scientific | Cat# AM9640G     |
| MgCl <sub>2</sub> (1 M)                                 | Thermo Fisher Scientific | Cat# AM9530G     |
| PBS, pH7.4                                              | Thermo Fisher Scientific | Cat# 10010023    |
| Tetrodotoxin Citrate (TTX)                              | Alomone Labs             | Cat# T-550       |
| Miglyol® 812                                            | Caesar & Loretz          | Cat# 3274        |
| Ketabel 100 mg/ml                                       | bela-pharm               | Ketamin          |
| Xylazine 2%                                             | Bayer                    | Rompun           |
| Buprenorphine                                           | Indivior                 | Cat# IND00979    |
| Dexamethasone                                           |                          |                  |
| TritonX-100                                             | Sigma-Aldrich            | Cat# T8787       |
| 4',6-Diamidin-2-phenylindol (DAPI)                      | Sigma-Aldrich            | Cat# D9542       |

#### Mouse lines

|                               |                         |     |
|-------------------------------|-------------------------|-----|
| Mouse: C57BL/6N               |                         | N/A |
| Mouse: A1AR <sup>fl/fl</sup>  | (Scammell et al., 2003) | N/A |
| Mouse: Glast-CreERT2          | (Mori et al., 2006)     | N/A |
| Mouse: Cx3cr1-CreERT2         | (Jung et al., 2000)     | N/A |
| Mouse: Cspg4-CreERT2          | (Huang et al., 2014)    | N/A |
| Mouse: RiboTag mice (Rlp22HA) | (Sanz et al., 2009)     | N/A |
| Mouse: Rosa 26-CAG-IsI-GCAMP3 | (Paukert et al., 2014)  | N/A |

#### Viruses

|                                           |                                                |         |
|-------------------------------------------|------------------------------------------------|---------|
| AAV2/5 GfaABC1D-GRAB <sub>Ado</sub> virus | gift from Yulong Li (Peking University, CN)    | N/A     |
| rAAV-GFAP-hM4D(Gi)-mCherry-WPREs, AAV2/5  | VTA Wuhan                                      | PT-1091 |
| AAV2/5-GFAP-tdtomato virus                | gift from André Zeug (Hannover Medical School) | N/A     |

| <b>Deposited Data</b>                 |         |                                        |                                                                                                                                                                 |
|---------------------------------------|---------|----------------------------------------|-----------------------------------------------------------------------------------------------------------------------------------------------------------------|
| Raw and analyzed data                 |         | This paper                             | GSE248275                                                                                                                                                       |
| <b>Software and Algorithms</b>        |         |                                        |                                                                                                                                                                 |
| ImageJ                                |         | (Schneideretal., 2012)                 | <a href="https://imagej.nih.gov/ij/">https://imagej.nih.gov/ij/</a>                                                                                             |
| Imaris                                |         | Bitplane                               | <a href="https://imaris.oxinst.com/">https://imaris.oxinst.com/</a>                                                                                             |
| Zen                                   |         | Zeiss                                  | <a href="https://www.zeiss.com/microscopy/de/produkte/software/zeiss-zen.html">https://www.zeiss.com/microscopy/de/produkte/software/zeiss-zen.html</a>         |
| Msparkles                             |         | (Stopper et al., 2023)                 | <a href="https://gitlab.com/Gebhard/MSparkles/">https://gitlab.com/Gebhard/MSparkles/</a>                                                                       |
| GraphPad Prism 10                     |         | GraphPad Software                      | <a href="https://www.graphpad.com/">https://www.graphpad.com/</a>                                                                                               |
| R statistical programming environment |         | R Foundation for Statistical Computing | <a href="https://www.r-project.org/">https://www.r-project.org/</a>                                                                                             |
| Bioconductor                          |         | (Huber et al., 2015)                   | <a href="https://bioconductor.org/">https://bioconductor.org/</a>                                                                                               |
| HISAT2                                |         | (Kim et al., 2019)                     | <a href="http://daehwankimlab.github.io/hisat2/">http://daehwankimlab.github.io/hisat2/</a>                                                                     |
| FastQC                                |         | (Andrews, 2010)                        | <a href="https://www.bioinformatics.babraham.ac.uk/projects/fastqc/">https://www.bioinformatics.babraham.ac.uk/projects/fastqc/</a>                             |
| FeatureCounts                         |         | (Liao et al., 2014)                    | <a href="https://rnnh.github.io/bioinfo-notebook/docs/featureCounts.html">https://rnnh.github.io/bioinfo-notebook/docs/featureCounts.html</a>                   |
| DESeq2                                |         | (Love et al., 2014)                    | <a href="https://bioconductor.org/packages/release/bioc/html/DESeq2.html">https://bioconductor.org/packages/release/bioc/html/DESeq2.html</a>                   |
| Pheatmap                              |         | (Kolde, 2019)                          | <a href="https://cran.r-project.org/web/packages/pheatmap/">https://cran.r-project.org/web/packages/pheatmap/</a>                                               |
| ClusterProfiler                       |         | (Yu et al., 2012)                      | <a href="https://bioconductor.org/packages/release/bioc/html/clusterProfiler.html">https://bioconductor.org/packages/release/bioc/html/clusterProfiler.html</a> |
| Metascape                             |         | (Zhou et al., 2019)                    | <a href="https://metascape.org/">https://metascape.org/</a>                                                                                                     |
| EthoVision XT 11.5                    |         | Noldus Technology                      | <a href="https://www.noldus.com/">https://www.noldus.com/</a>                                                                                                   |
| MATLAB                                |         | Mathworks                              | <a href="https://de.mathworks.com/">https://de.mathworks.com/</a>                                                                                               |
| Igor pro                              |         | Wavemetrics                            | <a href="https://www.wavemetrics.com/">https://www.wavemetrics.com/</a>                                                                                         |
| Biorender                             |         | Biorender                              | <a href="https://www.biorender.com/">https://www.biorender.com/</a>                                                                                             |
| <b>Primer sequences</b>               |         |                                        |                                                                                                                                                                 |
| Gene                                  | Primer  | Sequence                               | Purpose                                                                                                                                                         |
| <i>Actb</i>                           | Forward | CTTCCTCCCTGGAGAAGAGC                   | RT-qPCR                                                                                                                                                         |
|                                       | Reverse | ATGCCACAGGATTCCATACC                   |                                                                                                                                                                 |
| <i>Cxcl1</i>                          | Forward | AGACCATGGCTGGGATTACAC                  | RT-qPCR                                                                                                                                                         |
|                                       | Reverse | CTCGCGACCATTCTTGAGTGT                  |                                                                                                                                                                 |
| <i>Cxcl10</i>                         | Forward | AAGTGCTGCCGTCATTTTCT                   | RT-qPCR                                                                                                                                                         |
|                                       | Reverse | GTGGCAATGATCTCAACACG                   |                                                                                                                                                                 |
| <i>Ccl2</i>                           | Forward | GTTGGCTCAGCCAGATGCA                    | RT-qPCR                                                                                                                                                         |

|               |         |                           |                |
|---------------|---------|---------------------------|----------------|
|               | Reverse | AGCCTACTCATTGGGATCATCTTG  |                |
| <i>Ccl5</i>   | Forward | TGCCCACGTCAAGGAGTATTT     | RT-qPCR        |
|               | Reverse | TCTCTGGGTTGGCACACACTT     |                |
| <i>Lcn2</i>   | Forward | ATGTCACCTCCATCCTGGTC      | RT-qPCR        |
|               | Reverse | CACACTCACCACCCATTTCAG     |                |
| <i>Tnf</i>    | Forward | CCACCACGCTCTTCTGTCTAC     | RT-qPCR        |
|               | Reverse | AGGGTCTGGGCCATAGAACT      |                |
| <i>Il1a</i>   | Forward | CGCTTGAGTCGGCAAAGAAAT     | RT-qPCR        |
|               | Reverse | CTTCCCCTTGCTTGACGTTG      |                |
| <i>Il1b</i>   | Forward | TGCCACCTTTTGACAGTGATG     | RT-qPCR        |
|               | Reverse | TGATGTGCTGCTGCGAGATT      |                |
| <i>Il6</i>    | Forward | GAGTGGCTAAGGACCAAGACC     | RT-qPCR        |
|               | Reverse | AACGCACTAGGTTTGCCGA       |                |
| <i>Gfap</i>   | Forward | TGGAGGAGGAGATCCAGTTC      | RT-qPCR        |
|               | Reverse | AGCTGCTCCCGGAGTTCT        |                |
| <i>Pdgfra</i> | Forward | TCCTTCTACCACCTCAGCGAG     | RT-qPCR        |
|               | Reverse | CCGGATGGTCACTCTTTAGGAAG   |                |
| <i>Pdgfrb</i> | Forward | ATGAATCGCTGCTGGGCGCTCTTC  | RT-qPCR        |
|               | Reverse | TCAAAGGAGCGGATGGAGTGGTCCG |                |
| <i>Itgam</i>  | Forward | ATGGACGCTGATGGCAATACC     | RT-qPCR        |
|               | Reverse | TCCCCATTACGTCTCCCA        |                |
| GCaMP3 KI     | Forward | CACGTGATGACAAACCTTGG      | genotyping PCR |
| GCaMP3 KI     | Reverse | GGCATTAAAGCAGCGTATCC      |                |
| GCaMP3 WT     | Forward | CTCTGCTGCCTCCTGGCTTCT     | genotyping PCR |
| GCaMP3 WT     | Reverse | CGAGGCGGATCACAAAGCAATA    |                |
| GLAST         | Forward | GAGGCACTTGGCTAGGCTCTGAGGA | genotyping PCR |
| GLAST KI      | Reverse | GGTGTACGGTCAGTAAATTGGACAT |                |
| GLAST WT      | Reverse | GAGGAGATCCTGACCGATCAGTTGG |                |
| HA            | Forward | GGGAGGCTTGCTGGATATG       | genotyping PCR |
| HA            | Reverse | TTTCCAGACACAGGCTAAGTACAC  |                |
| A1AR          | Forward | CTTTGCCCTCAGCTGGCTACCG    | genotyping PCR |
| A1AR KI       | Reverse | ATCGGAATTCGCTAGCTTCGGC    |                |
| A1AR WT       | Reverse | TTCTCGGGGTCAGGAGAGCACC    |                |
